# Supplementary material
Source: publisher figshare collection journal article supplement (https://acs.figshare.com/ndownloader/files/20950608)
Supplement: Supplementary file 1 [file 20950608]

# Molecular Characteristics of Dissolved Organic Nitrogen and Its Interaction with Microbial Communities in Pre-chlorinated Raw Water Distribution System

Hang Xu,<sup>†, #</sup> Chenshuo Lin,<sup>\*, †, #</sup> Zhen Shen,<sup>†, #</sup> Li Gao,<sup>§</sup> Tao Lin,<sup>\*, †, #</sup> Hui Tao,<sup>†, #</sup> Wei Chen,<sup>†, #</sup> Jian Luo,<sup>⊥</sup> and Chunhui

Lu<sup>#</sup>

<sup>†</sup> Key Laboratory of Integrated Regulation and Resource Development on Shallow Lake of Ministry of Education, College of Environment, Hohai University, Nanjing 210098, China

<sup>#</sup> Hohai University, College of Environment, Nanjing 210098, China

<sup>§</sup> Future Water Strategy Group, South East Water, PO BOX 2268, Seaford, Victoria 3198, Australia

11 ‡ State Key Laboratory of Hydrology-Water Resources and Hydraulic Engineering, Hohai University, Nanjing, China

12 <sup>‡</sup>School of Civil and Environmental Engineering, Georgia Institute of Technology, Atlanta, GA 30332, USA

13 Chenshuo Lin and Hang Xu contributed equally to this work.

14 \*Corresponding Author (Chenshuo Lin e-mail: [Lincs23@126.com](mailto:Lincs23@126.com))

15 (Tao Lin e-mail: [hit\\_lintao@163.com](mailto:hit_lintao@163.com))

16

17 Number of pages: 11

18 Number of tables: 2

19 Number of figures: 5

20

## 21 Supporting Materials and Methods

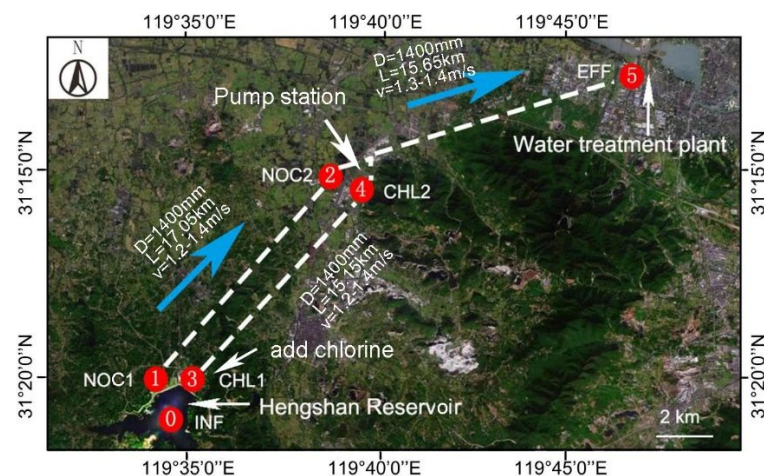

22  
23 **Figure S1.** Locations of sampling sites in Yixing, China: Hengshan Reservoir (INF), inlet and outlet of chlorinated pipe (CHL1 and CHL2, respectively),  
24 inlet and outlet of unchlorinated pipe (NOC1 and NOC2, respectively), and combined effluent (EFF).  
25

## 26 S1. Sampling process

27 DOM was extracted by solid-phase extraction (SPE) using the Bond Elut PPL SPE cartridges (500mg, 6ml; Agilent, USA), based on  
28 the method described by Dittmar et al.<sup>1</sup> These SPE cartridges were firstly rinsed and activated using methanol and 0.01mol L<sup>-1</sup> formic  
29 acid. Then the water sample (100 mL) was adjusted to pH 2 by 0.1mol L<sup>-1</sup> formic acid. The water sample passed through the cartridges  
30 with the flowrate of 5 mL min<sup>-1</sup>. Afterwards, the cartridges were rinsed with 50 mL acidified LC-MS water to remove the interference

of inorganic salts on FT-ICR-MS analysis. Analytes were subsequently eluted with methanol (1mL) and were stocked at 4°C until further analysis. Three DOM replicates were prepared for each site and mixed to one composite sample to mitigate artifacts.

High resolution mass spectrometry analysis was performed using a Apex QE 12 T (Bruker) equipped with an electrospray ionization (ESI, Bruker) source set in negative mode of ionization. Before FT-ICR-MS operation, formic acid (~98%) was used to adjust the samples' pH and rinse the SPE cartridges. After an internal calibration, the mass measurement accuracy was typically within 0.2 p.p.m. for singly charged ions across a broad m/z range (200–700m/z), which can be used to trace the molecular fate <sup>2</sup>.

## REFERENCES

- (1) Dittmar, T.; Koch, B.; Hertkorn, N.; Kattner, G. A simple and efficient method for the solid-phase extraction of dissolved organic matter (SPE-DOM) from seawater. *Limnol. Oceanogr.: Methods* 2008, 6, 230–235.
- (2) Maizel, A.C.; Remucal, C.K. The effect of advanced secondary municipal wastewater treatment on the molecular composition of dissolved organic matter. *Water Res.* 2017, 122, 42–52.

## S2. 16S rRNA sequencing

The PCR reactions for V4-V5 region of the 16S rRNA gene were carried out with primers 515F (5' -GTGCCAGCMGCCGCGG-3' ) and (5' -CCGTCAATTCMTTTRAGTTT-3' ) <sup>3</sup> and were performed in triplicate 20 µL mixture containing 4 µL of 5×FastPfu Buffer,

2  $\mu$ L of 2.5 mM dNTPs, 0.8  $\mu$ L of each primer (5  $\mu$ M), 0.4  $\mu$ L of FastPfu polymerase, and 10 ng of template DNA by PCR (94 °C for 3 min, 25 cycles of 95 °C for 30 s, 55 °C for 30 s, and 72 °C for 30 s, and finishing with a final extension at 72 °C for 5 min). Then electrophoresis was used on 2% agarose gel and amplicons were purified with Agencourt AMPure XP beads (Beckman, USA) for pyrosequencing on an Illumina MiSeq platform (Shanghai Sangon).

## REFERENCES

(3) Caporaso, J. G.; Lauber, C. L.; Walters, W. A.; Berg-Lyons, D.; Lozupone, C. A.; Turnbaugh, P.J.; Knight, R. Global patterns of 16S rRNA diversity at a depth of millions of sequences per sample. *Proc Natl Acad Sci U S A*. 2011, 108:4516–22.

**Table S1.** DON molecular formula list for each sample in PRWDSs

**Table S2.** Physiochemical parameters in PRWDSs

|     |        | Temperature | DO        | Turbidity | TOC       | pH        | Free chlorine | NH <sub>4</sub> <sup>+</sup> -N | NO <sub>2</sub> <sup>-</sup> -N | NO <sub>3</sub> <sup>-</sup> -N |
|-----|--------|-------------|-----------|-----------|-----------|-----------|---------------|---------------------------------|---------------------------------|---------------------------------|
|     |        | (°C)        | (mg/L)    | (NTU)     | (mg/L)    |           | (mg/L)        | (mg/L)                          | (mg/L)                          | (mg/L)                          |
| INF | April  | 18.3-20.4   | 8.43-9.25 | 4.02-4.21 | 2.88-3.55 | 7.56-8.33 |               | 0.168-0.208                     | 0.008-0.019                     | 1.372-1.403                     |
|     | June   | 21.6-24.9   | 6.38-7.11 | 2.82-3.15 | 2.47-3.33 | 7.48-8.04 | 0             | 0.157-0.194                     | 0.009-0.018                     | 1.130-1.151                     |
|     | August | 25.8-28.7   | 5.03-5.27 | 2.00-2.27 | 1.80-2.05 | 7.72-7.97 |               | 0.151-0.197                     | 0.006-0.015                     | 1.269-1.313                     |

|      |        |           |           |           |           |           |           |             |             |             |
|------|--------|-----------|-----------|-----------|-----------|-----------|-----------|-------------|-------------|-------------|
| NOC1 | April  | 19.1-20.6 | 7.75-8.51 | 3.41-3.86 | 2.75-3.01 | 7.71-8.45 |           | 0.140-0.175 | 0.007-0.013 | 1.501-1.629 |
|      | June   | 20.5-23.3 | 5.83-6.55 | 2.71-3.02 | 2.17-2.53 | 7.66-8.03 | 0         | 0.144-0.170 | 0.007-0.012 | 1.523-1.642 |
|      | August | 26.1-28.4 | 4.91-5.14 | 1.80-2.15 | 1.97-2.08 | 7.82-8.79 |           | 0.135-0.163 | 0.006-0.013 | 1.558-1.673 |
| NOC2 | April  | 18.3-19.8 | 6.81-7.89 | 2.89-3.36 | 2.48-2.75 | 8.37-8.87 |           | 0.129-0.151 | 0.004-0.006 | 1.717-1.769 |
|      | June   | 19.5-23.7 | 5.64-6.01 | 2.45-2.77 | 2.08-2.35 | 8.04-8.55 | 0         | 0.132-0.152 | 0.005-0.007 | 1.788-1.812 |
|      | August | 25.7-27.1 | 4.26-4.73 | 1.25-1.61 | 1.88-2.15 | 7.82-8.43 |           | 0.123-0.144 | 0.003-0.005 | 1.697-1.831 |
| CHL1 | April  | 19.3-21.6 | 7.88-8.31 | 2.85-3.13 | 2.93-3.22 | 8.03-8.51 | 0.85-1.01 | 0.139-0.170 | 0.010-0.015 | 1.298-1.322 |
|      | June   | 20.8-23.1 | 5.69-6.33 | 2.42-2.59 | 2.80-3.10 | 7.86-8.24 | 0.82-0.98 | 0.132-0.164 | 0.012-0.014 | 1.198-1.240 |
|      | August | 25.0-27.9 | 4.49-4.87 | 1.93-2.13 | 2.33-2.52 | 7.90-8.76 | 0.84-0.93 | 0.125-0.167 | 0.009-0.015 | 1.266-1.384 |
| CHL2 | April  | 18.1-20.2 | 6.63-7.47 | 2.92-3.30 | 3.01-3.36 | 7.79-8.39 | 0.57-0.78 | 0.129-0.170 | 0.006-0.011 | 1.347-1.469 |
|      | June   | 19.0-22.5 | 5.29-5.77 | 2.50-2.72 | 2.62-3.04 | 7.87-8.70 | 0.51-0.69 | 0.131-0.163 | 0.005-0.012 | 1.496-1.531 |
|      | August | 24.1-26.7 | 4.12-4.53 | 1.83-2.06 | 2.47-2.74 | 7.54-8.56 | 0.53-0.66 | 0.123-0.164 | 0.004-0.009 | 1.508-1.646 |
| EFF  | April  | 17.5-18.8 | 5.24-5.45 | 2.88-3.48 | 3.14-3.50 | 7.88-8.26 | 0.37-0.62 | 0.112-0.128 | 0.003-0.006 | 1.847-1.901 |
|      | June   | 19.4-21.9 | 3.68-3.91 | 2.39-2.55 | 2.56-2.91 | 8.02-8.43 | 0.33-0.52 | 0.115-0.132 | 0.002-0.004 | 1.761-1.809 |
|      | August | 24.3-26.7 | 2.83-3.04 | 1.66-2.00 | 2.35-2.58 | 7.96-8.32 | 0.30-0.57 | 0.096-0.120 | 0.002-0.005 | 1.781-1.827 |

---

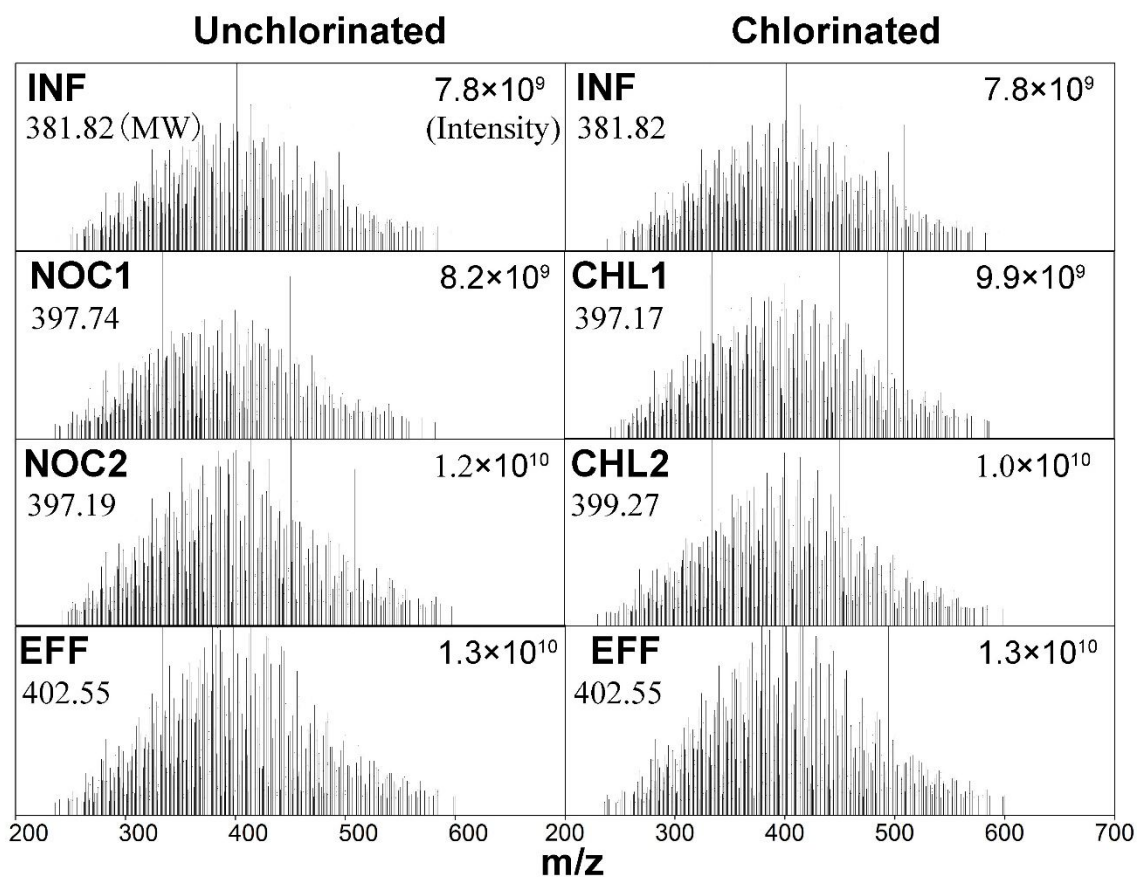

**Figure S2.** Mass spectra of the PRWDS water samples from INF, NOC1, NOC2, CHL1, CHL2 and EFF. The average MW and intensity of LMW-DON were showed under and on the right of the sample name, respectively.

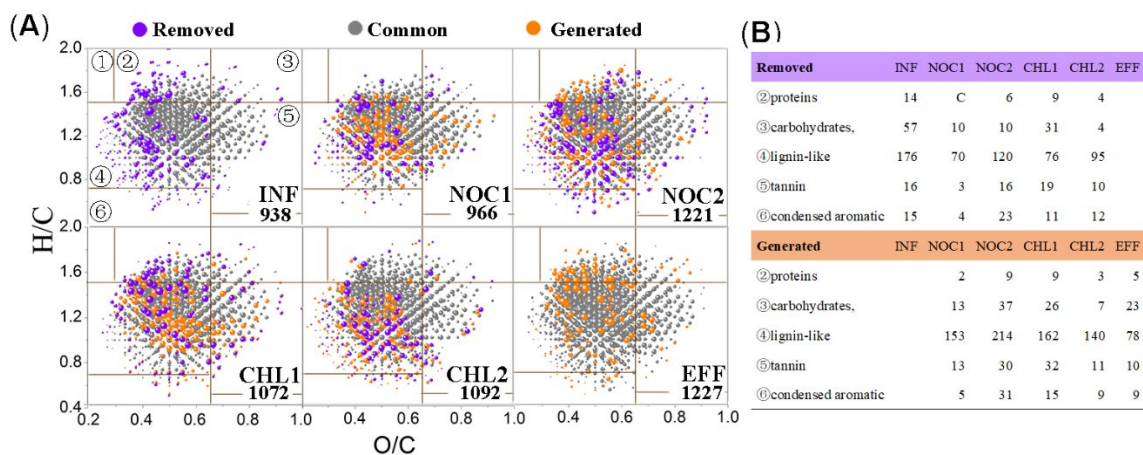

**Figure S3.** (A) Van Krevelen diagrams of the DON masses removed (Unique molecules compared to the subsequent sample are in purple), in common (Common molecules compared to both the subsequent and former samples are in grey) and formed (Unique molecules compared to the former sample are in orange) compared to the corresponding influent (①lipids, ②proteins, ③carbohydrates, ④lignin-like, ⑤tannin, and ⑥condensed aromatic, respectively). Bubble sizes of the dots represent the m/z of each formula. (B) Summary of removed (Unique molecules compared to the subsequent sample are in purple), and generated DON molecular formulas (Unique molecules compared to the former sample are in orange) sorted by the different classes. Lipids were not detected and measured in any samples.



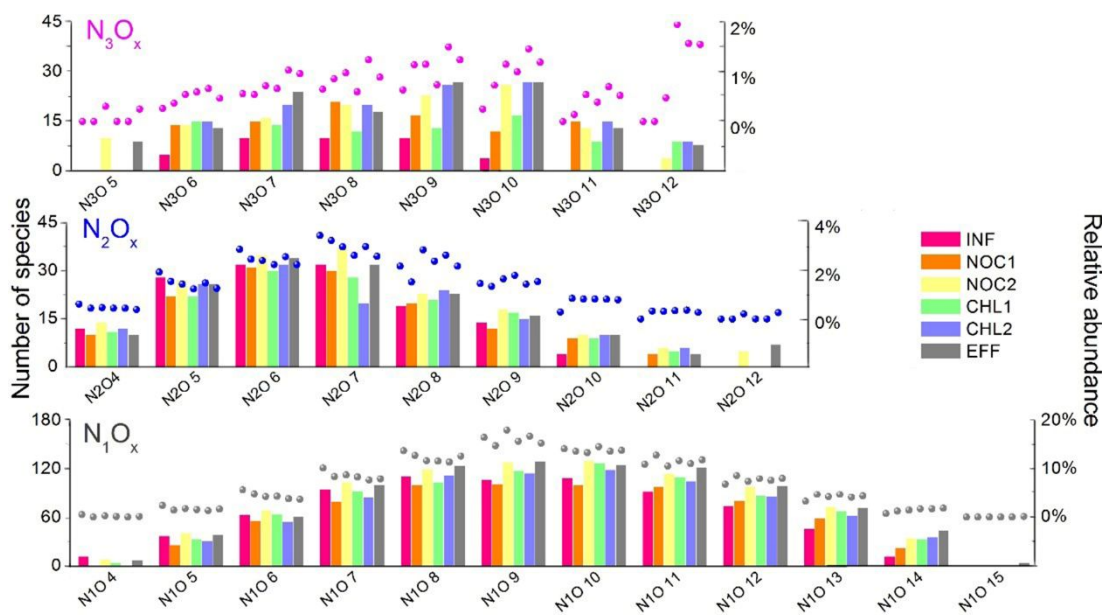

**Figure S4.** Classification of DON species into different subgroups according to the numbers of N and O atoms in their molecules in PRWDS. The histogram indicates the number of molecular formulae of each subgroup. And the scatter plots with right y-axis show the relative abundance of each subgroup based on the total intensity of all samples. The  $N_1O_p$ ,  $N_2O_p$ , and  $N_3O_p$  indicated one, two, and three N atoms in the DON molecule, respectively.

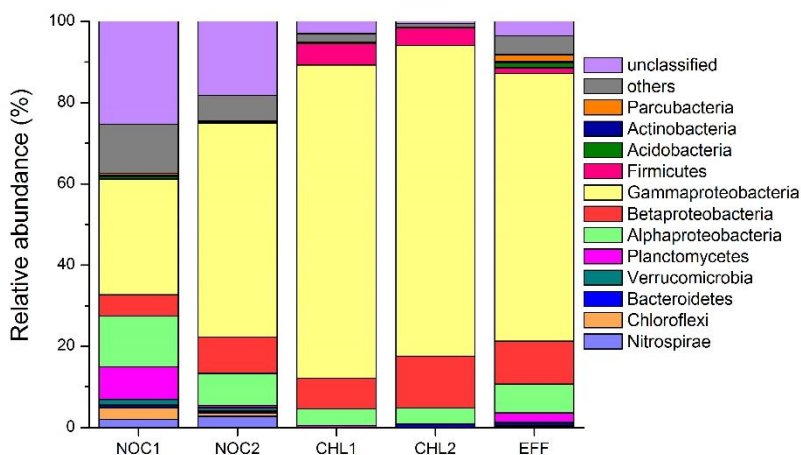

**Figure S5.** Relative abundance of the most abundant phyla from biofilm samples in PRWDS

83

84

**Table S3.** Bacterial abundance and diversity of biofilm samples in the PRWDS

| Sample    | Seq_num | OTU_num | Shannon | ACE      | Chao1    | Coverage | Simpson |
|-----------|---------|---------|---------|----------|----------|----------|---------|
| NOC1-Apr. | 58280   | 3484    | 7.590   | 3826.756 | 3503.886 | 0.933    | 0.012   |
| NOC1-Jun. | 59852   | 3502    | 7.597   | 3900.253 | 3521.932 | 0.923    | 0.010   |
| NOC1-Aug. | 62037   | 3566    | 7.602   | 3963.920 | 3572.451 | 0.917    | 0.009   |
| NOC2-Apr. | 54173   | 2252    | 5.806   | 2433.935 | 2681.981 | 0.994    | 0.016   |
| NOC2-Jun. | 56491   | 2304    | 5.812   | 2566.125 | 2753.395 | 0.992    | 0.015   |
| NOC2-Aug. | 58064   | 2330    | 5.814   | 2701.047 | 2953.943 | 0.912    | 0.014   |
| CHL1-Apr. | 41528   | 899     | 3.222   | 1337.773 | 1352.042 | 0.990    | 0.075   |
| CHL1-Jun. | 42155   | 905     | 3.229   | 1455.284 | 1469.375 | 0.928    | 0.072   |
| CHL1-Aug. | 44687   | 924     | 3.231   | 1503.354 | 1521.240 | 0.944    | 0.070   |
| CHL2-Apr. | 39904   | 948     | 3.314   | 1578.828 | 1557.412 | 0.949    | 0.050   |
| CHL2-Jun. | 40689   | 991     | 3.317   | 1632.944 | 1651.062 | 0.956    | 0.048   |
| CHL2-Aug. | 43008   | 1015    | 3.322   | 1679.903 | 1677.284 | 0.937    | 0.047   |
| EFF-Apr.  | 42604   | 1306    | 4.087   | 1773.792 | 1738.205 | 0.997    | 0.041   |

|          |       |      |       |          |          |       |       |
|----------|-------|------|-------|----------|----------|-------|-------|
| EFF-Jun. | 42978 | 1332 | 4.092 | 1794.329 | 1745.974 | 0.935 | 0.038 |
| EFF-Aug. | 45088 | 1380 | 4.102 | 1812.046 | 1798.095 | 0.963 | 0.036 |

---

85

86

87

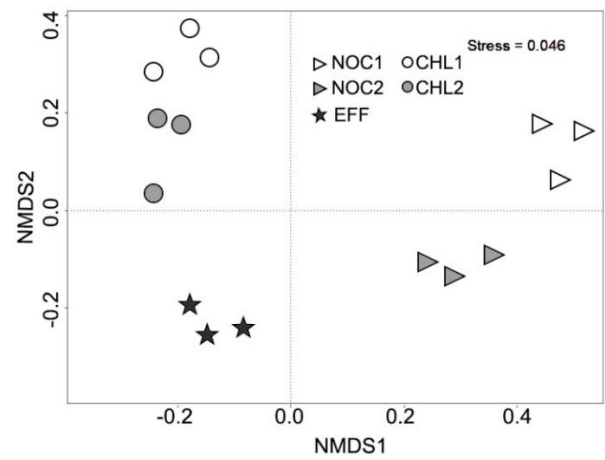

88

89 **Figure S6.** NMDS analysis of BMC based on the OTUs detected from biofilm samples in PRWDS.

90

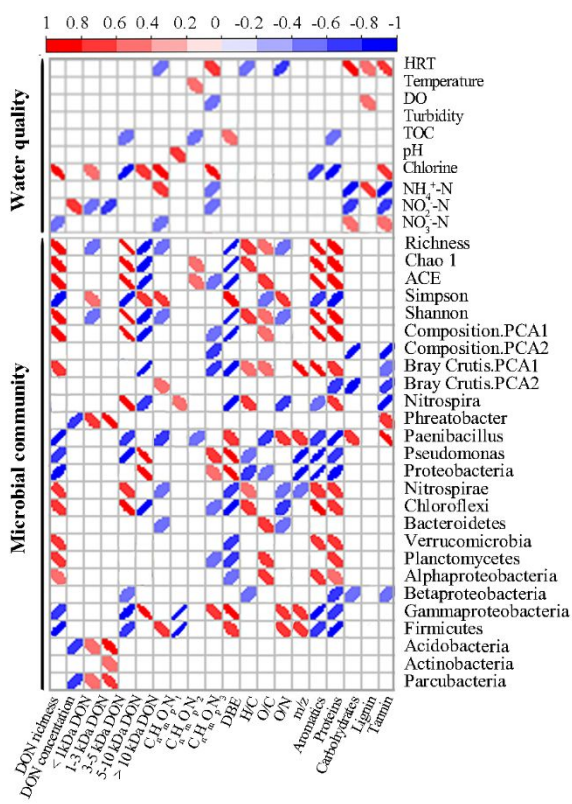

91

92 **Figure S7.** Spearman correlations coefficients between DON characteristics, water quality along the

93 pipe and microbial properties in the PRWDS with  $p < 0.05$ .
